# Supplementary material
Source: bioRxiv or medRxiv preprint supplement (http://medrxiv.stage.highwire.org/highwire/filestream/93144/field_highwire_adjunct_files/1/2020.08.13.20173666-2.pdf)
Supplement: Supplementary file [file 2020.08.13.20173666-2.pdf]

## Twelve-year changes in protein profiles in patients with and without gastric bypass surgery.

Noha A. Yousri<sup>1,2,\*</sup>, Rudolf Engelke<sup>3</sup>, Hina Sarwath<sup>3</sup>, Rodrick D. McKinlay<sup>4</sup>, Steven C. Simper<sup>4</sup>, Ted D.

Adams<sup>5,6</sup>, Frank Schmidt<sup>3,7</sup>, Karsten Suhre<sup>8</sup>, Steven C. Hunt<sup>1,6</sup>

<sup>1</sup> Department of Genetic Medicine, Weill Cornell Medicine, Doha, Qatar

<sup>2</sup> Computer and Systems Engineering, Alexandria University, Egypt

<sup>3</sup> Proteomics core, Weill Cornell Medicine, Doha, Qatar

<sup>4</sup> Rocky Mountain Associated Physicians, Salt Lake City, Utah

<sup>5</sup> Intermountain Live Well Center, Intermountain Healthcare, Salt Lake City, Utah

<sup>6</sup> Department of Internal Medicine, University of Utah, Salt Lake City, Utah

<sup>7</sup> Department of Biochemistry, Weill Cornell Medicine, Doha, Qatar

<sup>8</sup> Department of Physiology and Biophysics, Weill Cornell Medicine, Doha, Qatar

**Supplementary Table 1.** Protein levels significantly different at 12-year follow-up between surgery subjects who regained  $\geq 10\%$  of their presurgical weight from exam 2 to exam 4 and those who maintained their weight with  $<10\%$  weight regain.

| Protein | N   | Beta  | SE   | P-value  | Maintained Weight | Regained Weight |
|---------|-----|-------|------|----------|-------------------|-----------------|
| LEP     | 227 | 13366 | 1726 | 3.19E-13 | 13600±12065       | 26353±15902     |
| APCS    | 228 | 5493  | 908  | 5.99E-09 | 27984±7221        | 33722±7496      |
| IGFBP2  | 227 | -356  | 62   | 2.47E-08 | 1104±557          | 722±340         |
| SHBG    | 226 | -1397 | 270  | 4.97E-07 | 5506±2366         | 4006±1874       |
| WFIKKN2 | 228 | -1068 | 237  | 1.10E-05 | 7746±1930         | 6608±1738       |
| HTRA2   | 227 | -528  | 118  | 1.25E-05 | 3464±1042         | 2961±675        |

Proteins adjusted for gender, age and baseline BMI.  $P < 0.05/1297$ .

Regression statistics (regained compared with maintained group) and mean±standard deviations of protein abundance at 12 years for each group are shown.

**Supplementary Table 2.** Significantly over-represented Genetic Association Database (GAD) Disease terms identified from the 78 proteins associated with BMI change or surgery group status in Table 2.

| GAD Disease          | N  | P-value  | Proteins                                                                                                                      |
|----------------------|----|----------|-------------------------------------------------------------------------------------------------------------------------------|
| Bone Mineral Density | 18 | 5.60E-04 | WIF1; ADIPOQ; BMPR1A; CNTFR; DKK3;<br>FGFR1; GHRL; GHR; IGF1R; IGFBP1; IGFBP2;<br>IL1R1; LEPR; NTRK3; SPP1; SHBG; TGFBR3; LEP |
| Obesity              | 12 | 7.20E-04 | ADIPOQ; BMPR1A; DDC; GHRL; GHR; IGF1R;<br>IGFBP1; IGFBP2; LEPR; SHBG; TGFBR3; LEP                                             |
| Metabolic syndrome   | 8  | 2.40e-02 | CCL11; ADIPOQ; GHRL; GHR; IGFBP1; LEPR;<br>LEP; MMP12                                                                         |
| Schizophrenia        | 14 | 2.80E-02 | MET; WIF1; ADIPOQ; CHL1; DDC; FGFR1;<br>GHRL; IGF1R; IL1R1; LEP; NCAM1; NTRK3;<br>RTN4R; UNC5C                                |
| Body weight          | 8  | 3.10E-02 | CD109; AFM; CNTFR; GHR; LEPR; NEGR1;<br>NTRK3; GHRL                                                                           |
| Diabetes, type 2     | 13 | 4.10E-02 | CCL11; CRP; MET; ADIPOQ; APOM; C5; GHRL;<br>IGF1R; IGFBP2; LEPR; LEP; REG1A; SHBG                                             |

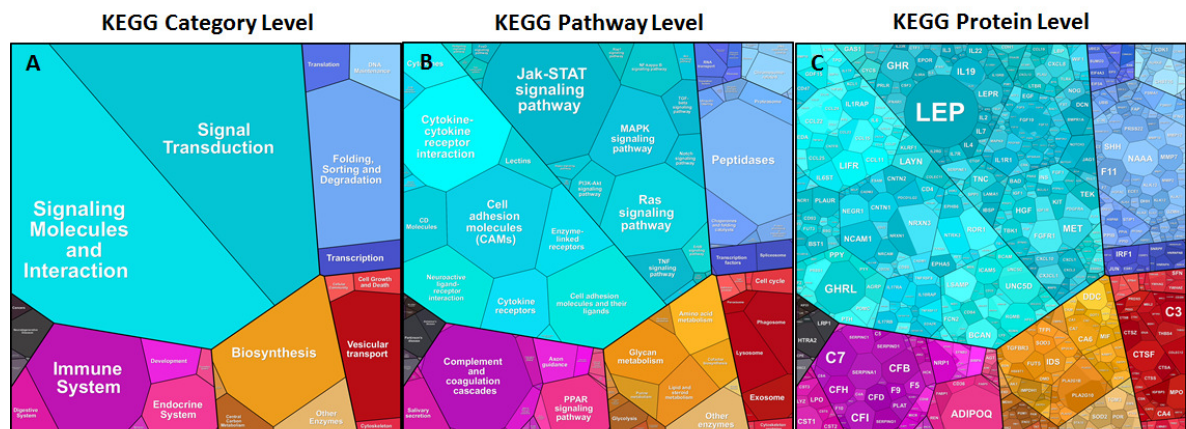

A

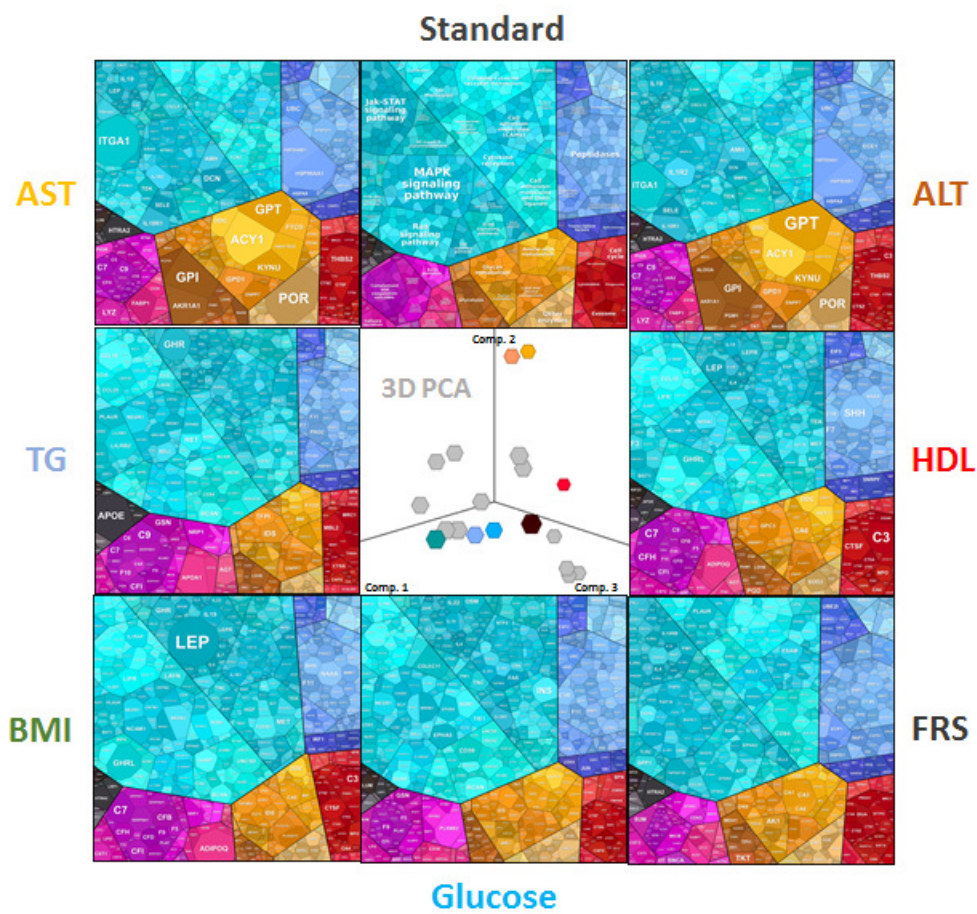

B

Standard

AST

ALT

TG

HDL

BMI

FRS

Glucose

C

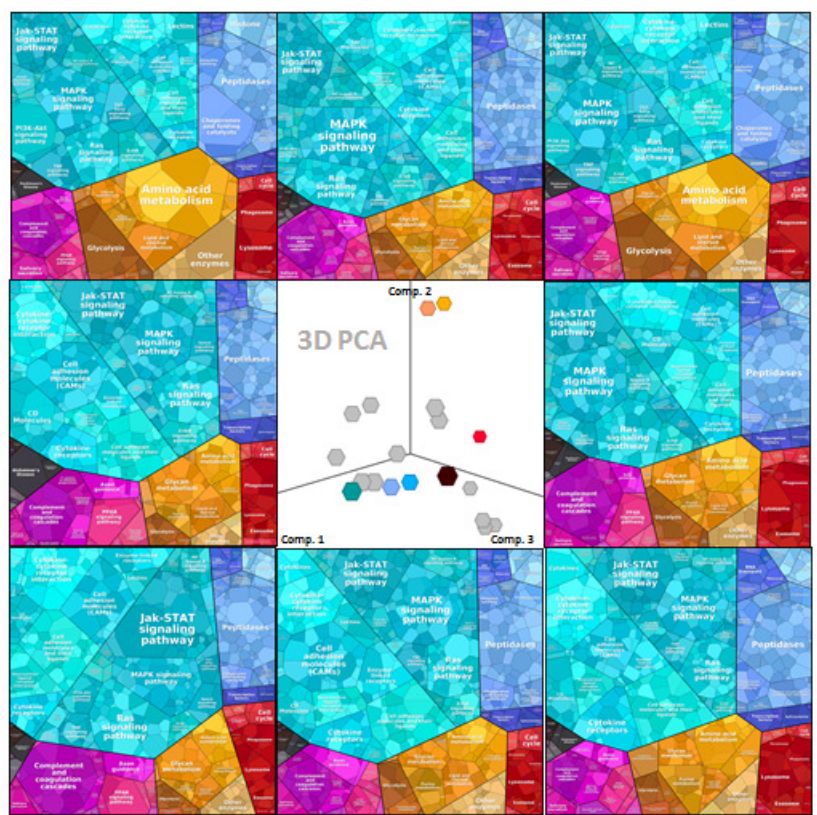

Supplementary Figure 1A. Treemap KEGG pathway levels for change in BMI using 78 proteins. The three levels represent general category, pathways within categories and proteins within pathways. Each category location and size remains constant for all three figures. The size represents the importance of each category, pathway or protein.

Supplementary Figure 1B. Treemap analysis pathway level III (KEGG Orthology Brite) for 950 of the 1297 proteins that could be placed on a pathway. The color-coded 3D principal component plot of the clinical variables is in the center with the significance of the proteins most strongly related to the clinical variables shown within cells defined by Treemap category levels I and II. Size of the cells reflect the absolute beta values of each protein changes with changes in BMI. FRS: Framingham Risk Score

Supplementary Figure 1C. Treemap analysis pathway level II (KEGG Orthology Brite). The color-coded 3D principal component plot of the clinical variables is in the center with the pathways for the proteins most strongly related to the clinical variables shown within cells defined by Treemap category level I. Size of the cells reflect the significance of each pathway represented by the underlying absolute beta values for protein changes with changes in BMI of Figure 1B. FRS: Framingham Risk Score
